# Supplementary material
Source: PubMed Central journal article supplement (PMC4545412)

## Supporting Information

### New Bioactive Lupane Triterpene Coumaroyl Esters Isolated from *Buxus cochinchinensis*

Li Pan<sup>1</sup>, Ulyana Muñoz Acuña<sup>2</sup>, Heebyung Chai<sup>1</sup>, Hyun-Young Park<sup>1</sup>, Tran Ngoc Ninh<sup>3</sup>, Bui Van Thanh<sup>3</sup>, Emilio F. Merino<sup>4</sup>, Maria B. Cassera<sup>4</sup>, L. Harinantenaina Rakotondraibe<sup>1</sup>, Esperanza J. Carcache de Blanco<sup>1,2</sup>, Djaja D. Soejarto<sup>5,6</sup>, A. Douglas Kinghorn<sup>1</sup>

#### Affiliation

<sup>1</sup> Division of Medicinal Chemistry and Pharmacognosy, College of Pharmacy

<sup>2</sup> Division of Pharmacy Practice and Administration, College of Pharmacy, The Ohio State University, Columbus, OH 43210, USA

<sup>3</sup> Institute of Ecology and Biological Resources, Vietnam Academy of Science and Technology, Hoang Quoc Viet, Cau Giay, Hanoi, Vietnam

<sup>4</sup> Department of Biochemistry and the Virginia Tech Center for Drug Discovery, M/C 0308, Virginia Tech, Blacksburg, VA 24061, USA

<sup>5</sup> Department of Medicinal Chemistry and Pharmacognosy, College of Pharmacy, University of Illinois at Chicago, Chicago, IL 60612, USA

<sup>6</sup> Science and Education, Field Museum of Natural History, 1400 S. Lake Shore Drive, Chicago, IL 60605, USA

#### Corresponding author

Prof. Dr. A. Douglas Kinghorn, Division of Medicinal Chemistry and Pharmacognosy, College of Pharmacy, The Ohio State University, Columbus, OH 43210, USA. E-mail: [kinghorn.4@osu.edu](mailto:kinghorn.4@osu.edu) Phone: +1 614 247 8642 Fax: +1 614 247 8081

Dedicated to Professor Dr. Adolf Nahrstedt on the occasion of his 75<sup>th</sup> birthday

## Supporting information list

- Figure S1.**  $^1\text{H}$  NMR spectra of compound **1**(DMSO, 400 MHz).
- Figure S2.**  $^{13}\text{C}$  DEPT 135 spectrum of compound **1** (DMSO, 100 MHz).
- Figure S3.**  $^{13}\text{C}$  NMR spectrum of compound **1** (DMSO, 100 MHz).
- Figure S4.** HSQC spectrum of compound **1** (DMSO, 400 MHz).
- Figure S5.** HMBC spectrum of compound **1** (DMSO, 400 MHz).
- Figure S6.** COSY spectrum of compound **1** (DMSO, 400 MHz).
- Figure S7.** NOESY spectrum of compound **1** (DMSO, 400 MHz).
- Figure S8.**  $^1\text{H}$  NMR spectra of compound **2**( $\text{CDCl}_3$ , 400 MHz).
- Figure S9.**  $^{13}\text{C}$  DEPT 135 spectrum of compound **2** ( $\text{CDCl}_3$ , 100 MHz).
- Figure S10.**  $^{13}\text{C}$  NMR spectrum of compound **2** ( $\text{CDCl}_3$ , 100 MHz).
- Figure S11.** HSQC spectrum of compound **2** ( $\text{CDCl}_3$ , 400 MHz).
- Figure S12.** HMBC spectrum of compound **2** ( $\text{CDCl}_3$ , 400 MHz).
- Figure S13.** COSY spectrum of compound **2** ( $\text{CDCl}_3$ , 400 MHz).
- Figure S14.** NOESY spectrum of compound **2** ( $\text{CDCl}_3$ , 400 MHz).
- Figure S15.**  $^1\text{H}$  NMR spectra of compound **3** ( $\text{CDCl}_3$ , 400 MHz).
- Figure S16.**  $^{13}\text{C}$  DEPT 135 spectrum of compound **3** ( $\text{CDCl}_3$ , 100 MHz).
- Figure S17.**  $^{13}\text{C}$  NMR spectrum of compound **3** ( $\text{CDCl}_3$ , 100 MHz).
- Figure S18.** HSQC spectrum of compound **3** ( $\text{CDCl}_3$ , 400 MHz).
- Figure S19.** HMBC spectrum of compound **3** ( $\text{CDCl}_3$ , 400 MHz).
- Figure S20.** COSY spectrum of compound **3** ( $\text{CDCl}_3$ , 400 MHz).
- Figure S21.** NOESY spectrum of compound **3** ( $\text{CDCl}_3$ , 400 MHz).
- Figure S22.**  $^1\text{H}$  NMR spectra of compound **4** ( $\text{CDCl}_3$ , 400 MHz).
- Figure S23.**  $^{13}\text{C}$  DEPT 135 spectrum of compound **4** ( $\text{CDCl}_3$ , 100 MHz).
- Figure S24.**  $^{13}\text{C}$  NMR spectrum of compound **4** ( $\text{CDCl}_3$ , 100 MHz).

**Figure S25.** HSQC spectrum of compound **4** (CDCl<sub>3</sub>, 400 MHz).

**Figure S26.** HMBC spectrum of compound **4** (CDCl<sub>3</sub>, 400 MHz).

**Figure S27.** COSY spectrum of compound **4** (CDCl<sub>3</sub>, 400 MHz).

**Figure S28.** NOESY spectrum of compound **4** (CDCl<sub>3</sub>, 400 MHz).

**Figure S29.** <sup>1</sup>H NMR spectra of compound **5** (CDCl<sub>3</sub>, 400 MHz).

**Figure S30.** <sup>13</sup>C DEPT 135 spectrum of compound **5** (CDCl<sub>3</sub>, 100 MHz).

**Figure S31.** <sup>13</sup>C NMR spectrum of compound **5** (CDCl<sub>3</sub>, 100 MHz).

**Figure S32.** HSQC spectrum of compound **5** (CDCl<sub>3</sub>, 400 MHz).

**Figure S33.** HMBC spectrum of compound **5** (CDCl<sub>3</sub>, 400 MHz).

**Figure S34.** COSY spectrum of compound **5** (CDCl<sub>3</sub>, 400 MHz).

**Figure S35.** NOESY spectrum of compound **5** (CDCl<sub>3</sub>, 400 MHz).

**Figure S36.** <sup>1</sup>H NMR spectra of 3,28-*O*-diacetylbetulin (CDCl<sub>3</sub>, 400 MHz).

**Figure S37.** <sup>1</sup>H NMR spectra of 23-hydroxybetulin (CDCl<sub>3</sub>, 400 MHz).

Figure S1.  $^1\text{H}$  NMR spectra of compound **1**(DMSO, 400 MHz).

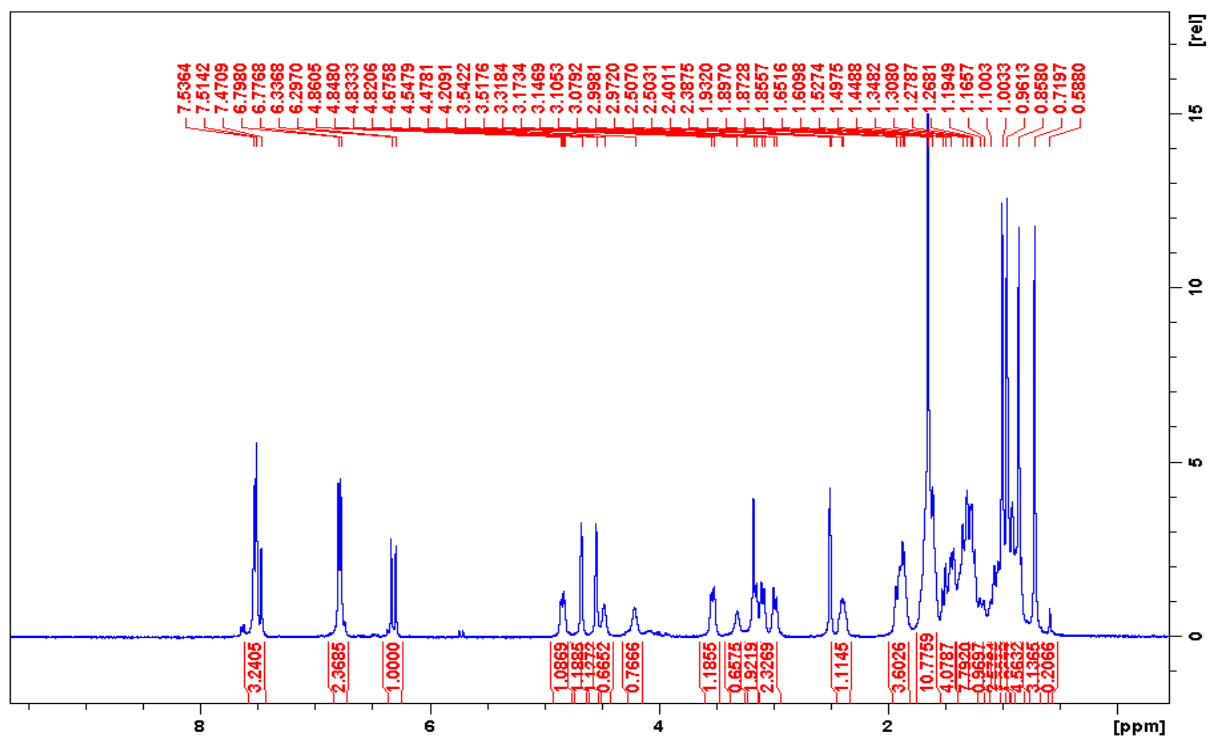

Figure S2.  $^{13}\text{C}$  DEPT 135 spectrum of compound **1** (DMSO, 100 MHz).

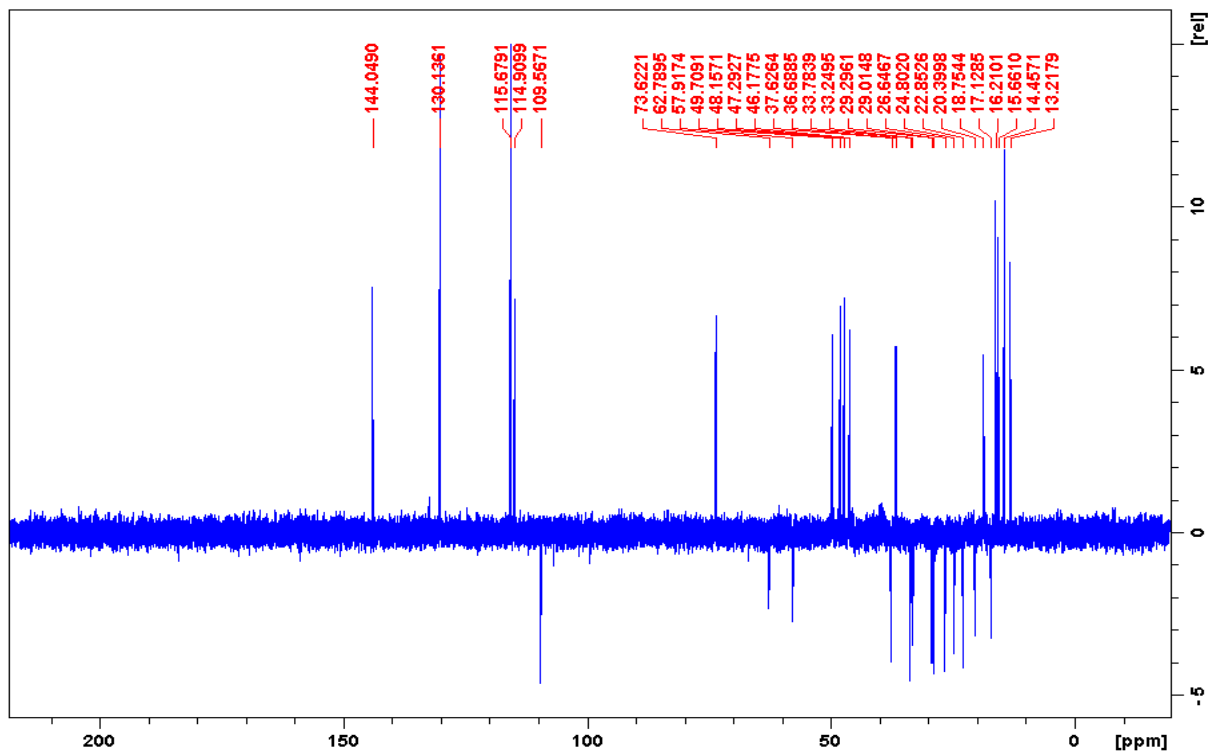

Figure S3.  $^{13}\text{C}$  NMR spectrum of compound **1** (DMSO, 100 MHz).

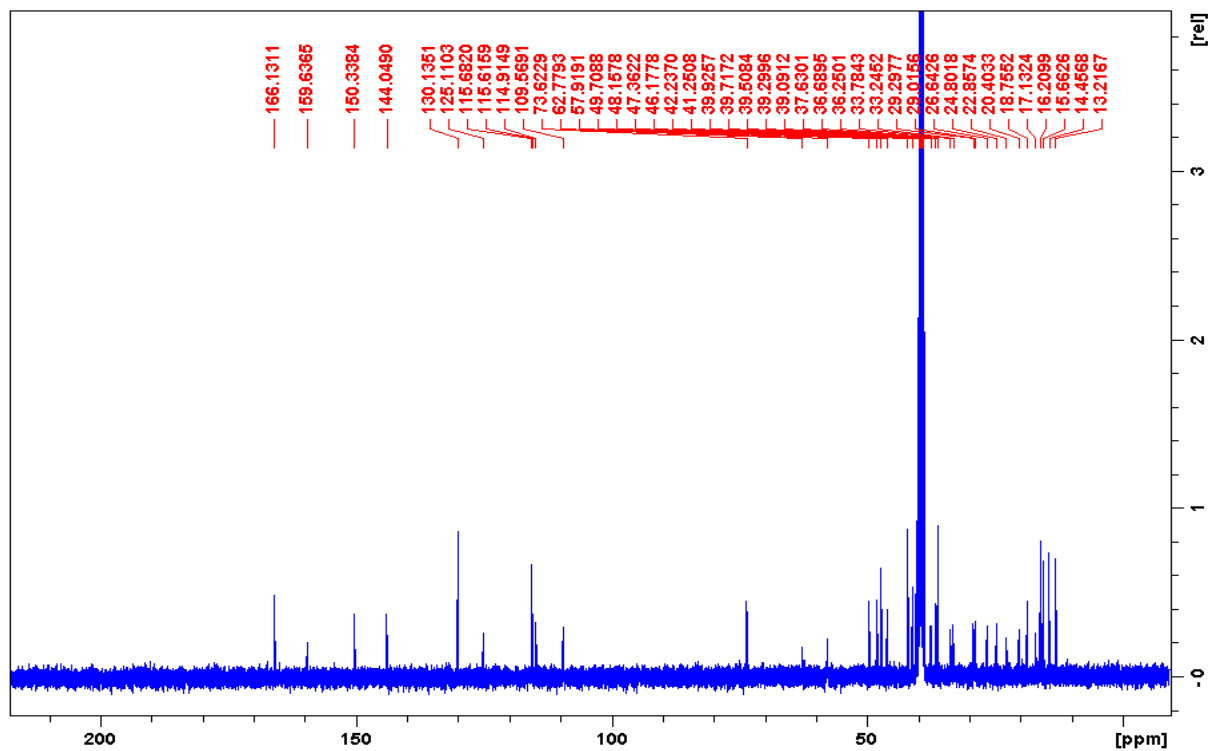

Figure S4. HSQC spectrum of compound **1** (DMSO, 400 MHz).

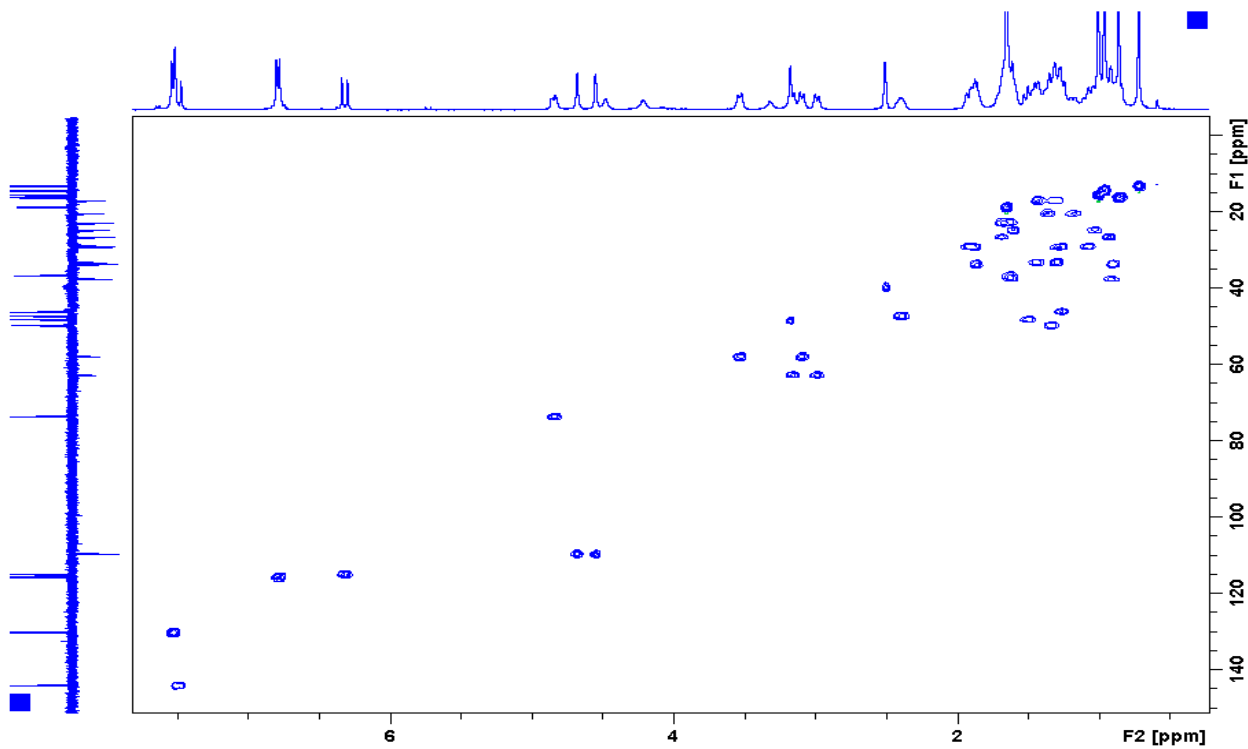

Figure S5. HMBC spectrum of compound 1 (DMSO, 400 MHz).

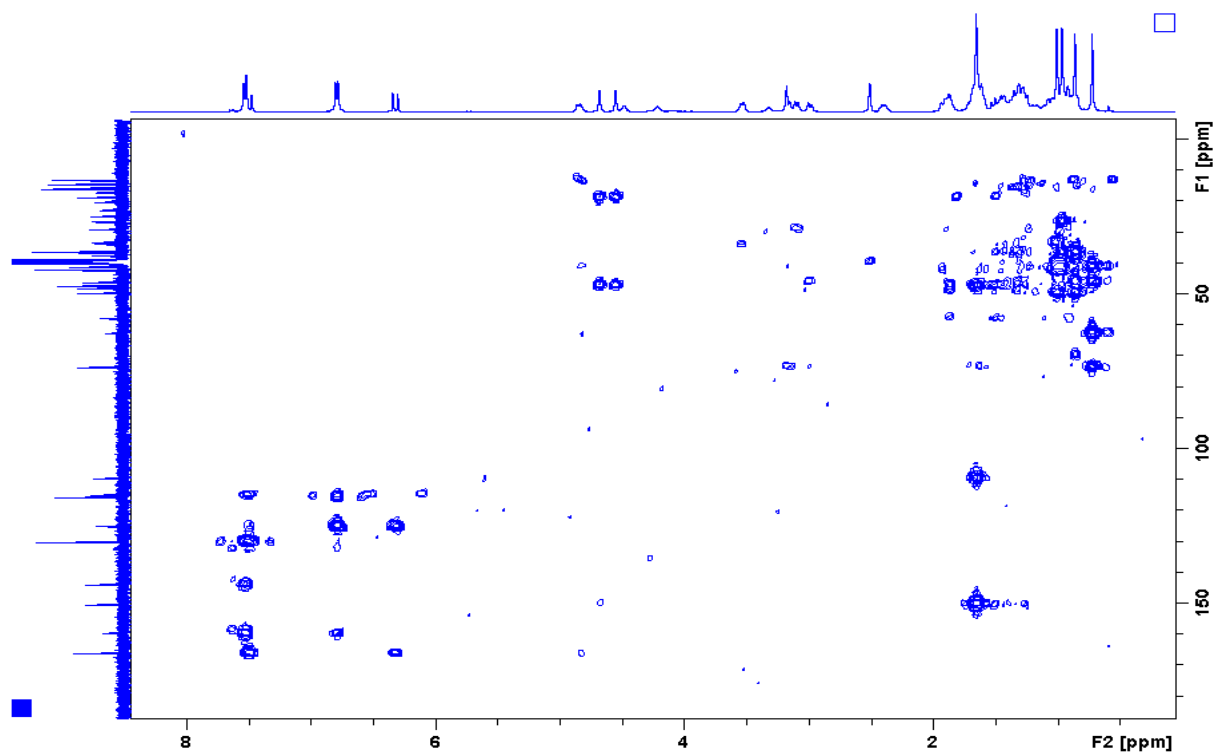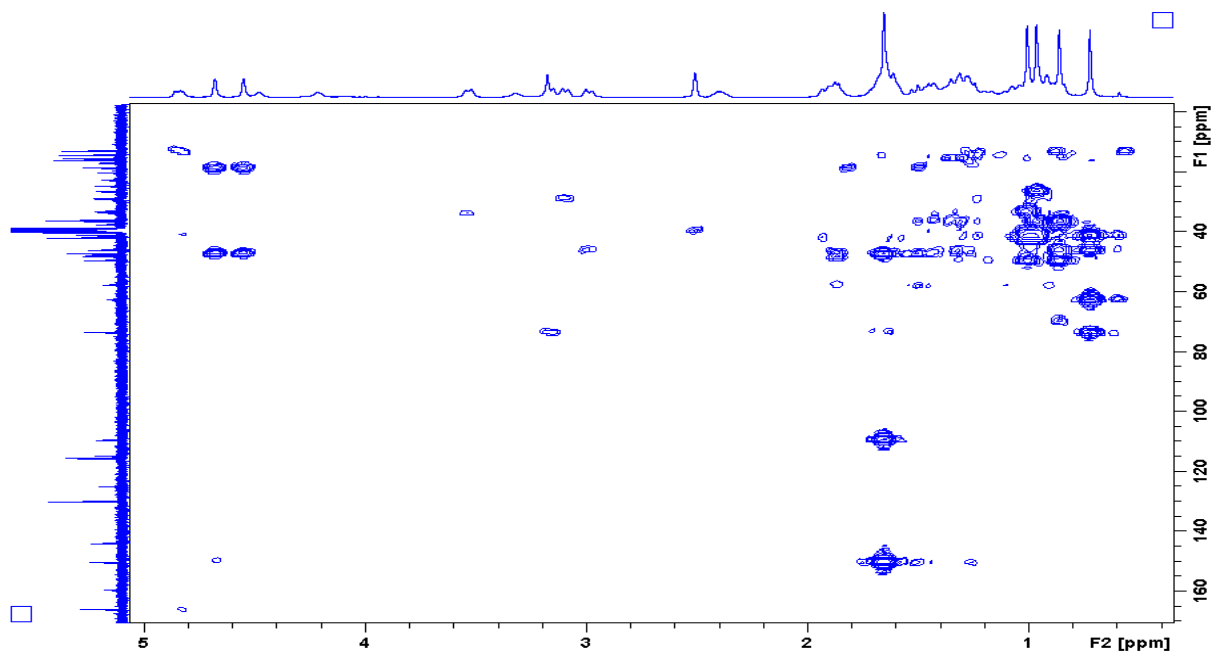



**Figure S8.**  $^1\text{H}$  NMR spectra of compound **2** ( $\text{CDCl}_3$ , 400 MHz).

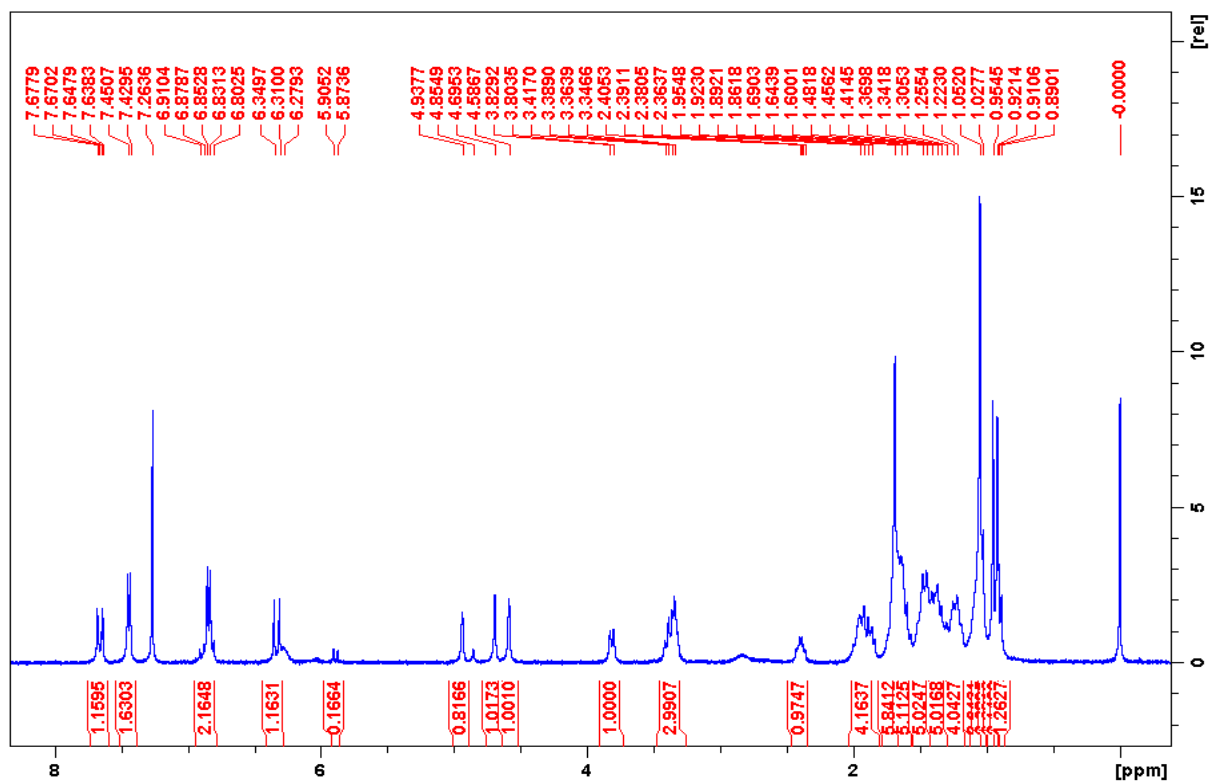

**Figure S9.**  $^{13}\text{C}$  DEPT 135 spectrum of compound **2** ( $\text{CDCl}_3$ , 100 MHz).

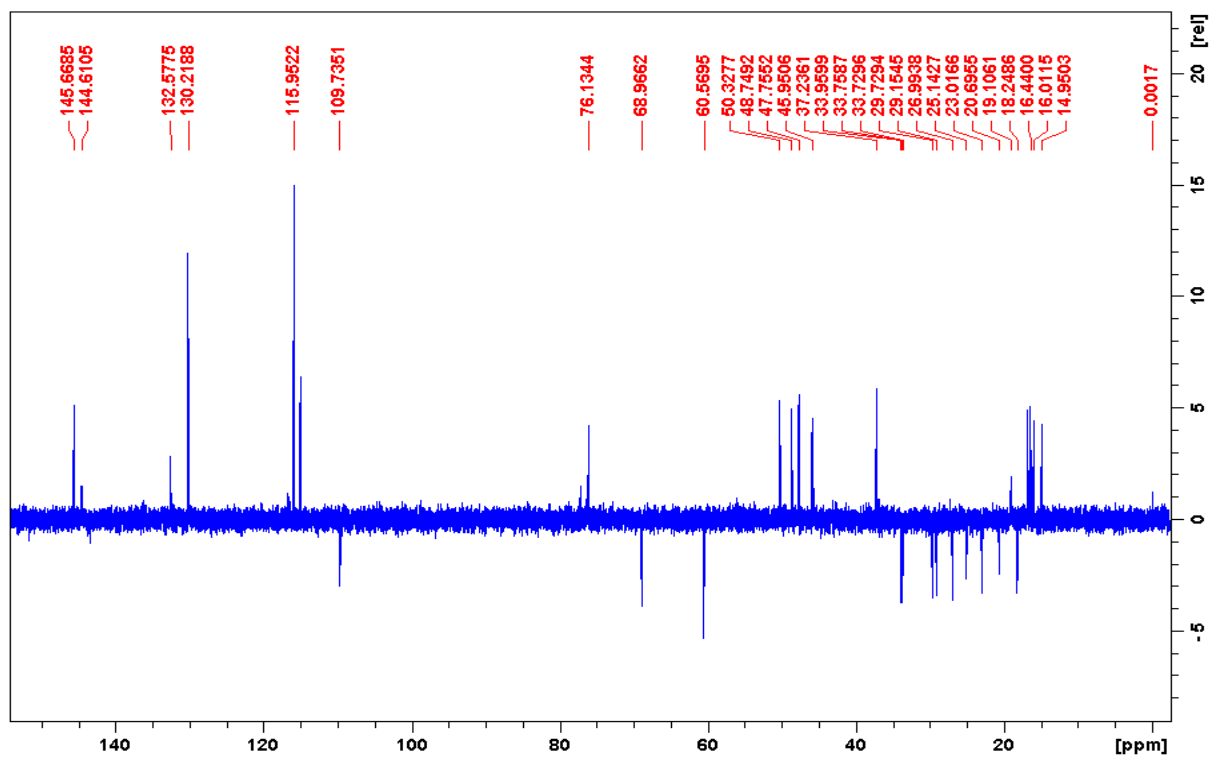



Figure S10.  $^{13}\text{C}$  NMR spectrum of compound **2** ( $\text{CDCl}_3$ , 100 MHz).

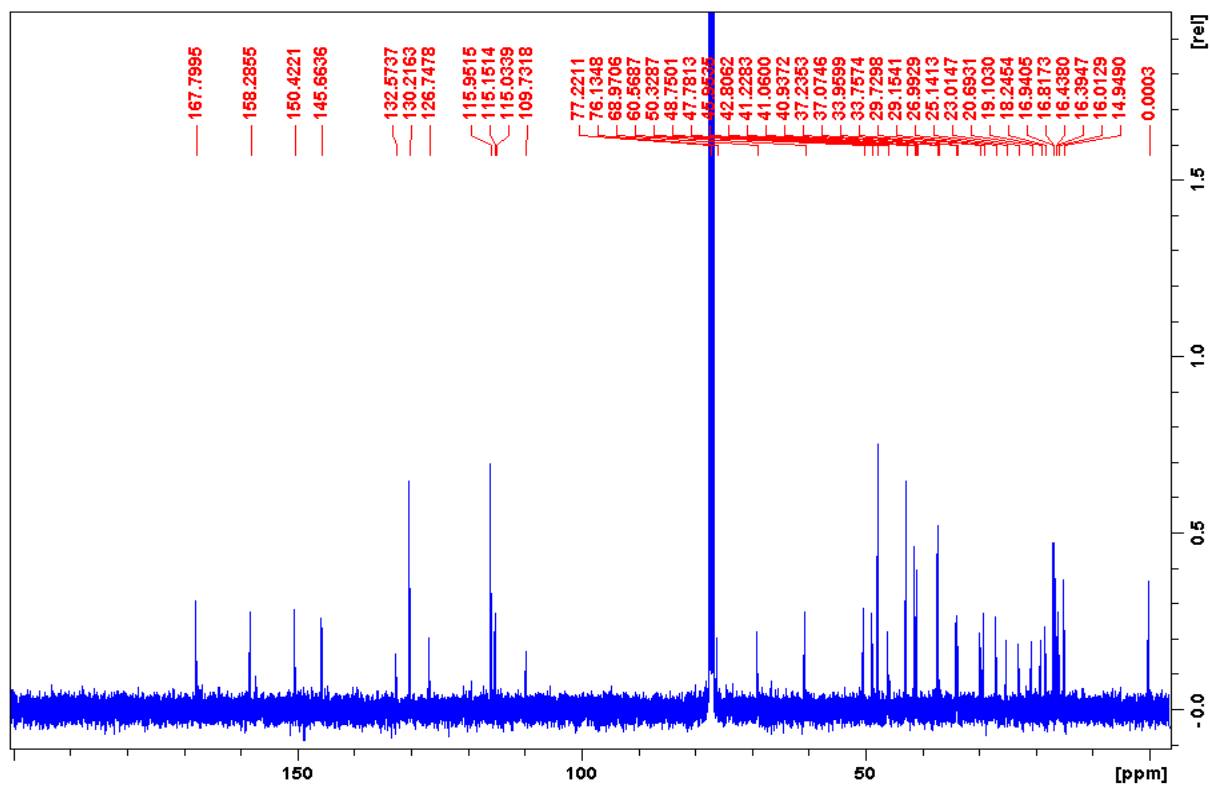

Figure S11. HSQC spectrum of compound **2** ( $\text{CDCl}_3$ , 400 MHz).

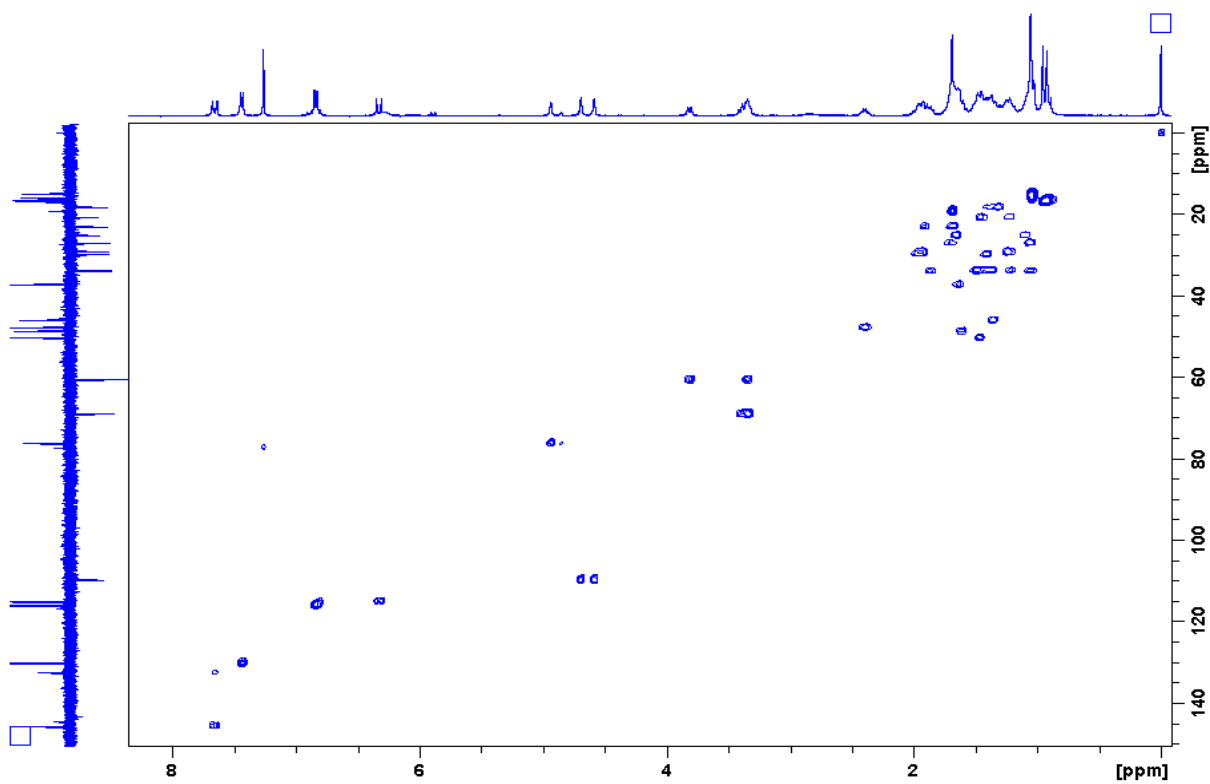

**Figure S12.** HMBC spectrum of compound **2** (CDCl<sub>3</sub>, 400 MHz).

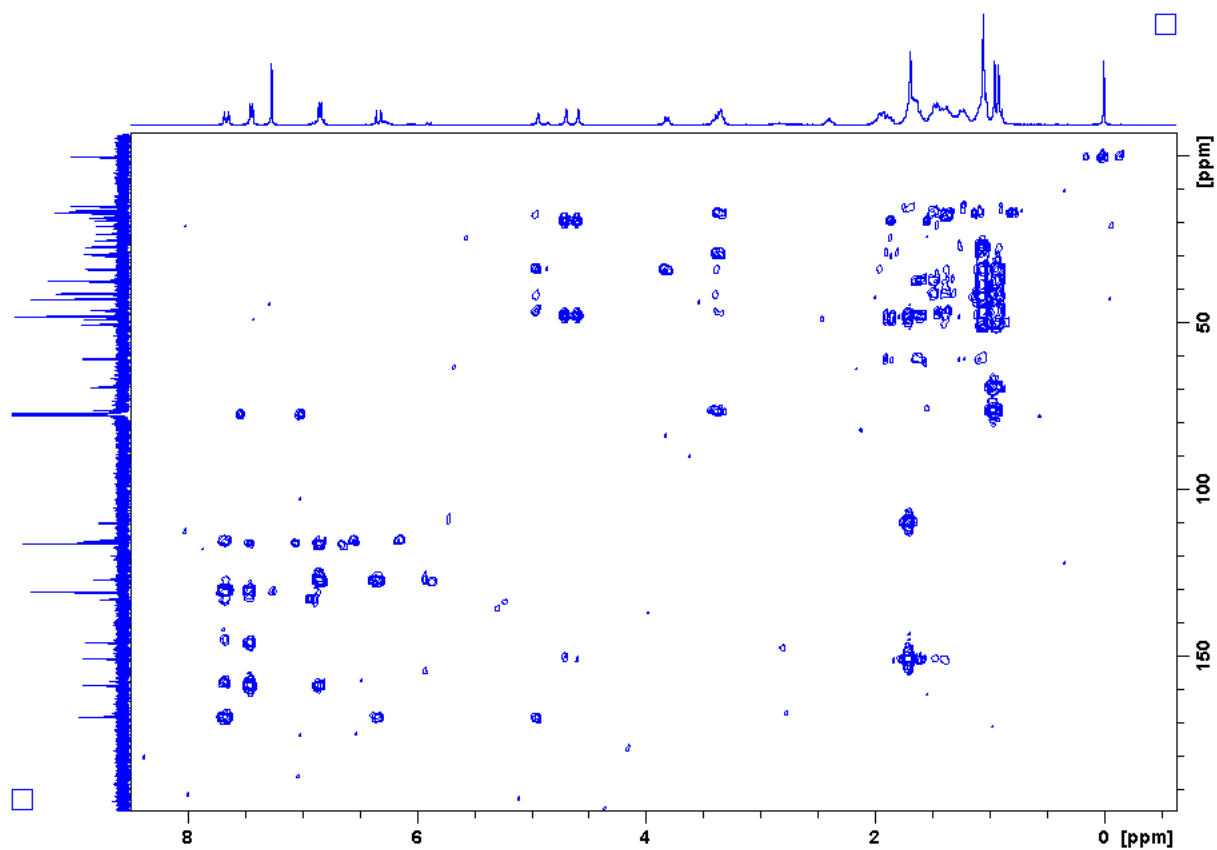

**Figure S13.** COSY spectrum of compound **2** (CDCl<sub>3</sub>, 400 MHz).

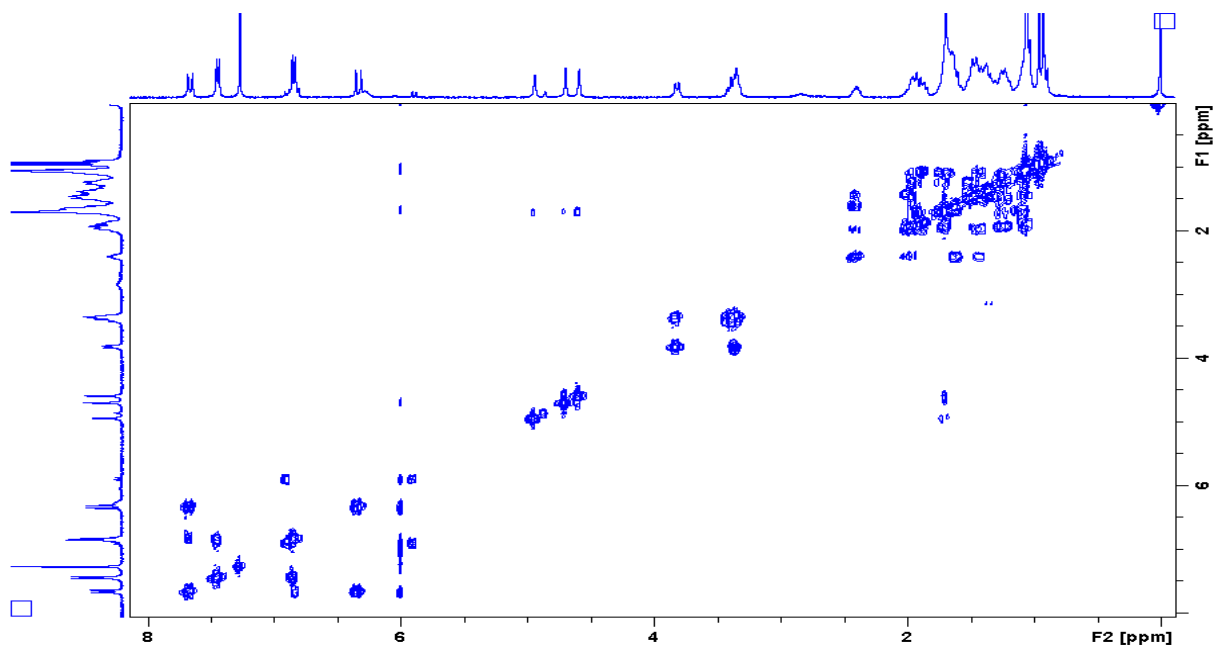



Figure S16.  $^{13}\text{C}$  DEPT 135 spectrum of compound **3** ( $\text{CDCl}_3$ , 100 MHz).

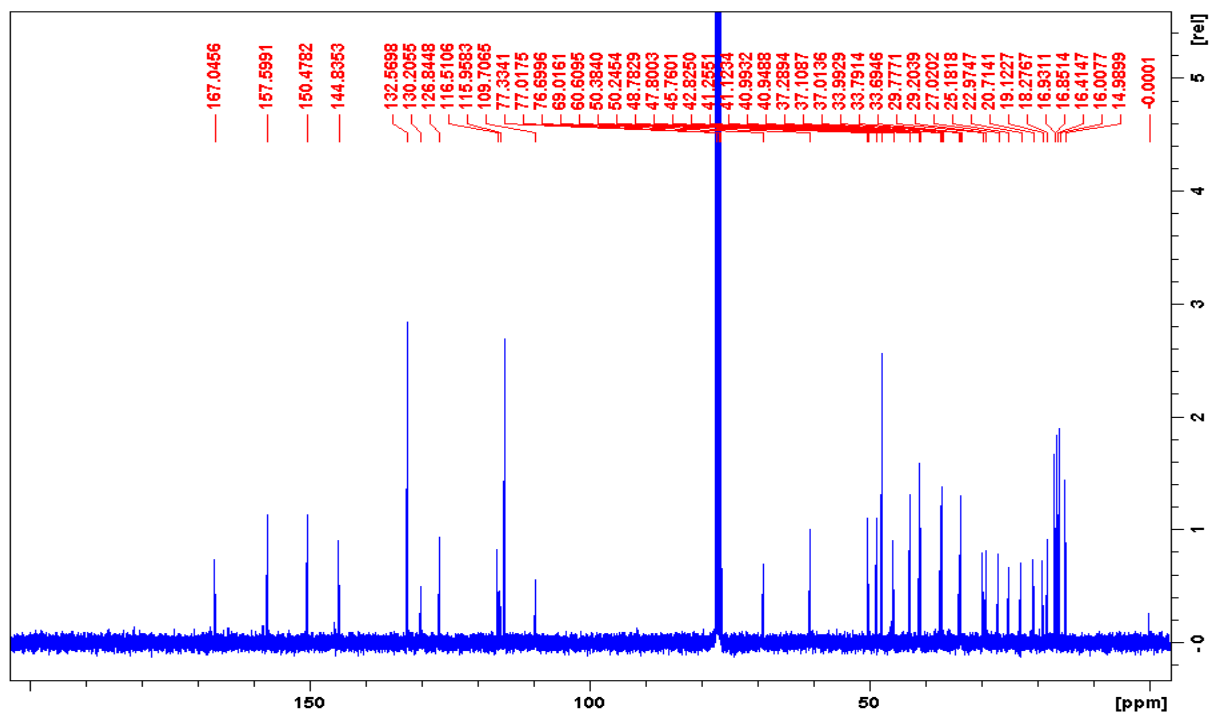

Figure S17.  $^{13}\text{C}$  NMR spectrum of compound **3** ( $\text{CDCl}_3$ , 100 MHz).

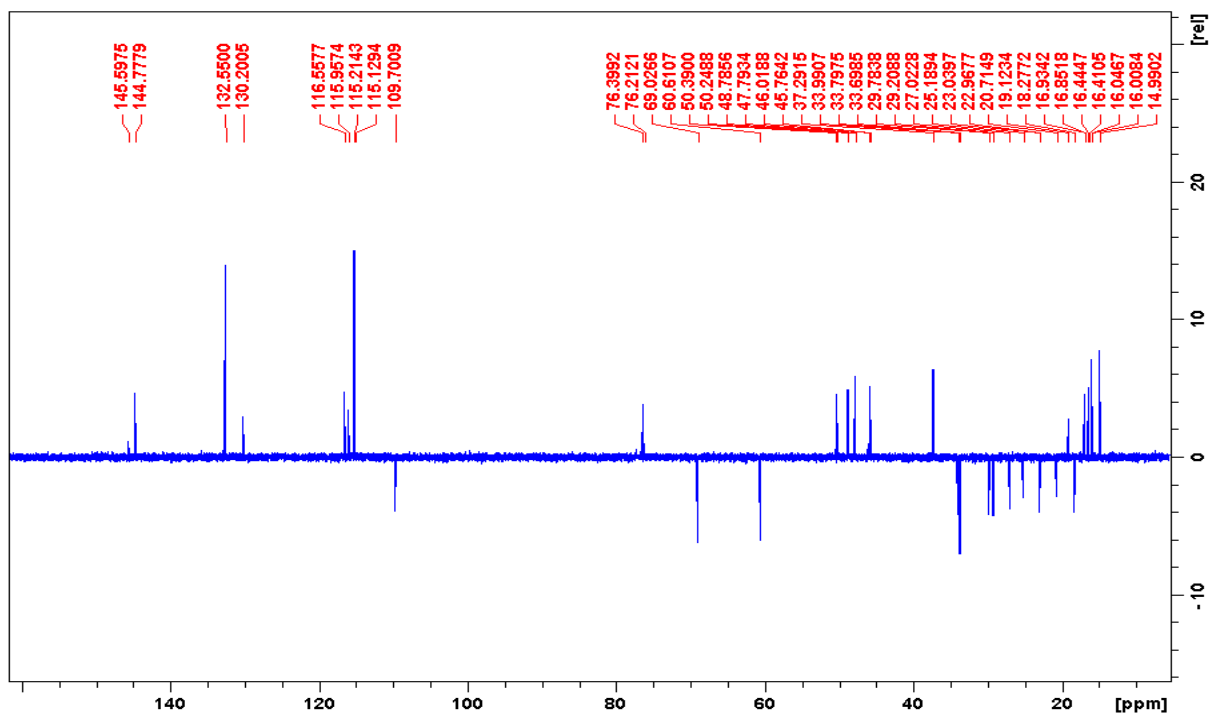

**Figure S18.** HSQC spectrum of compound **3** (CDCl<sub>3</sub>, 400 MHz).

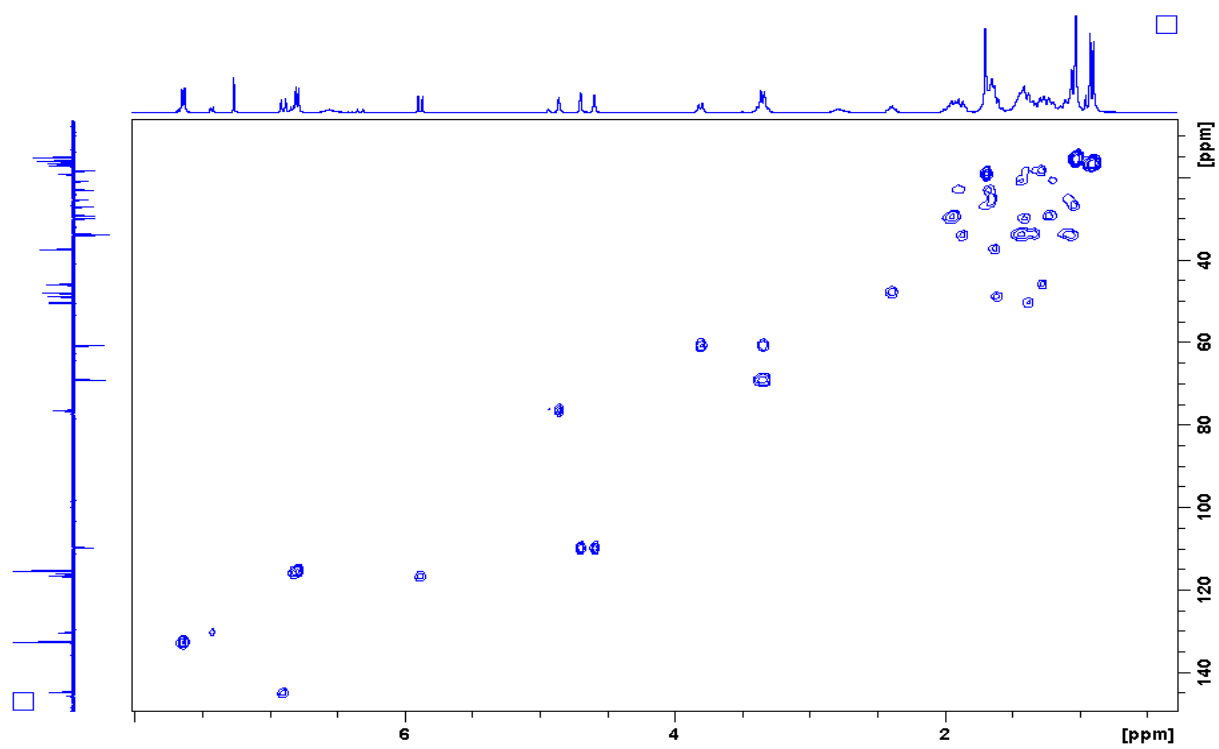

**Figure S19.** HMBC spectrum of compound **3** (CDCl<sub>3</sub>, 400 MHz).

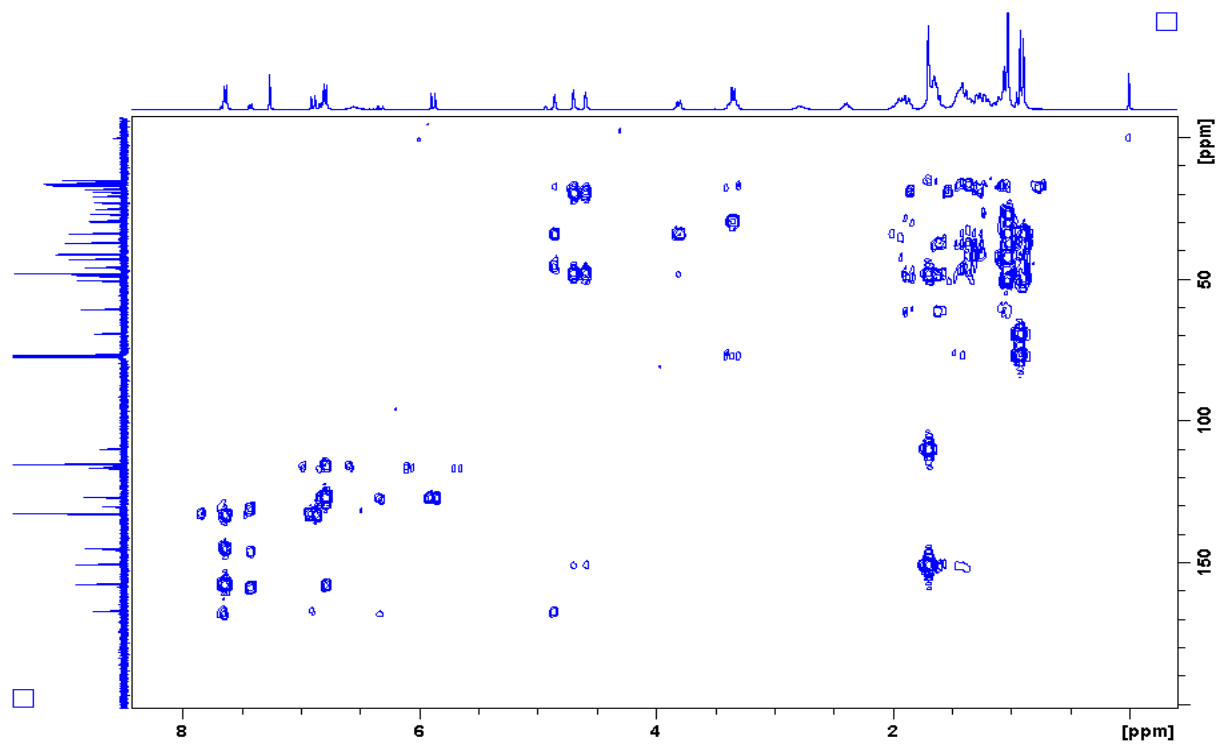

**Figure S20.** COSY spectrum of compound **3** (CDCl<sub>3</sub>, 400 MHz).

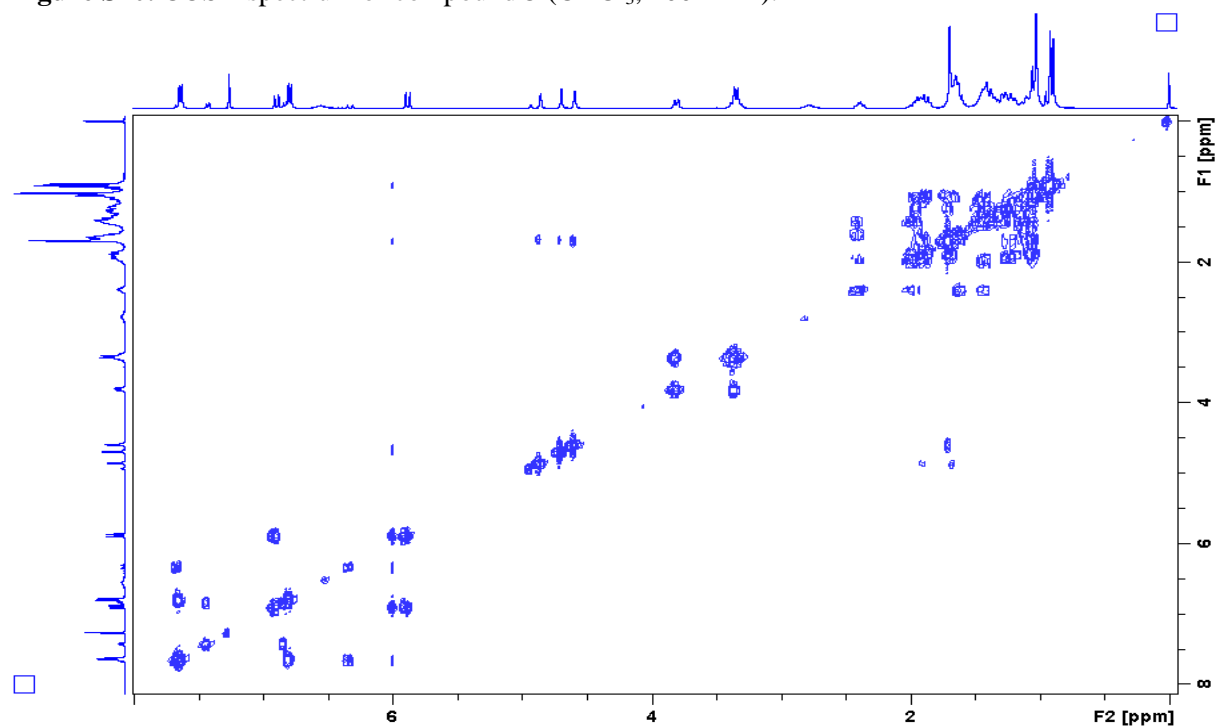

**Figure S21.** NOESY spectrum of compound **3** (CDCl<sub>3</sub>, 400 MHz).

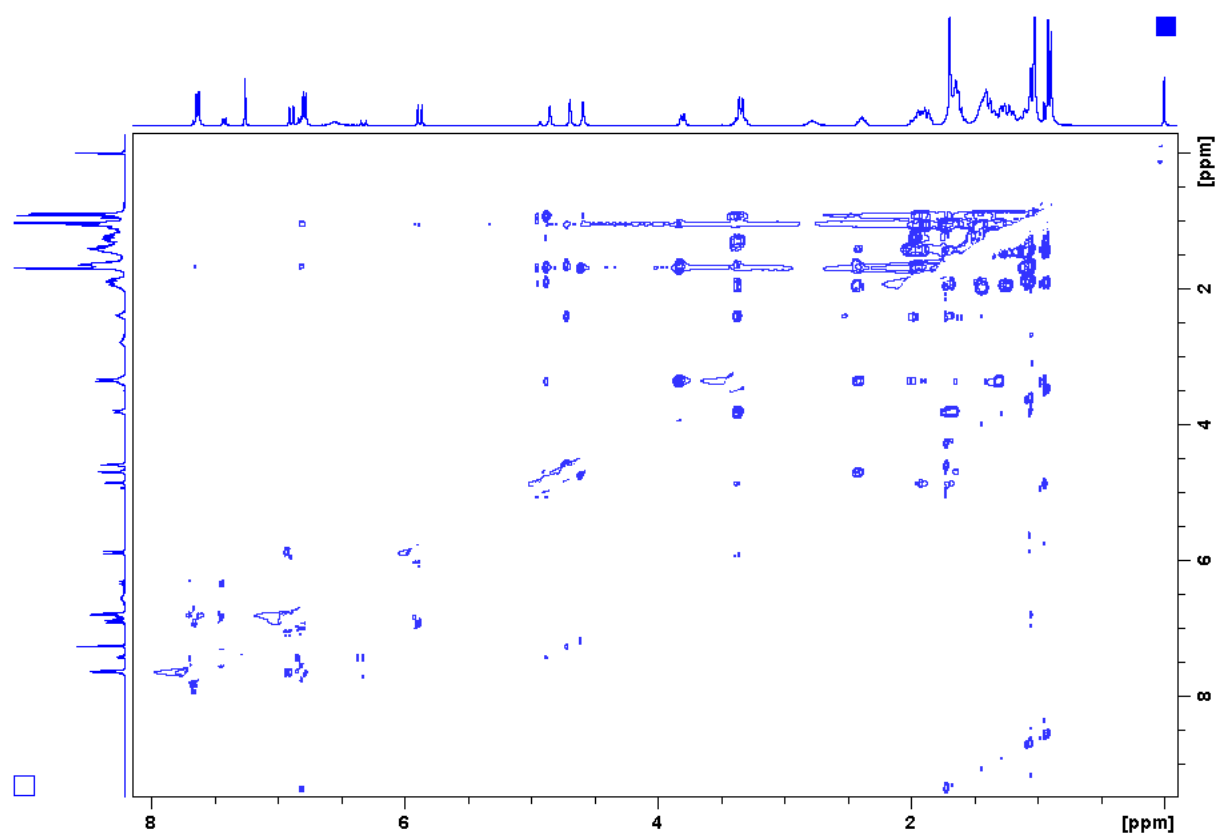

Figure S22.  $^1\text{H}$  NMR spectra of compound **4** ( $\text{CDCl}_3$ , 400 MHz).

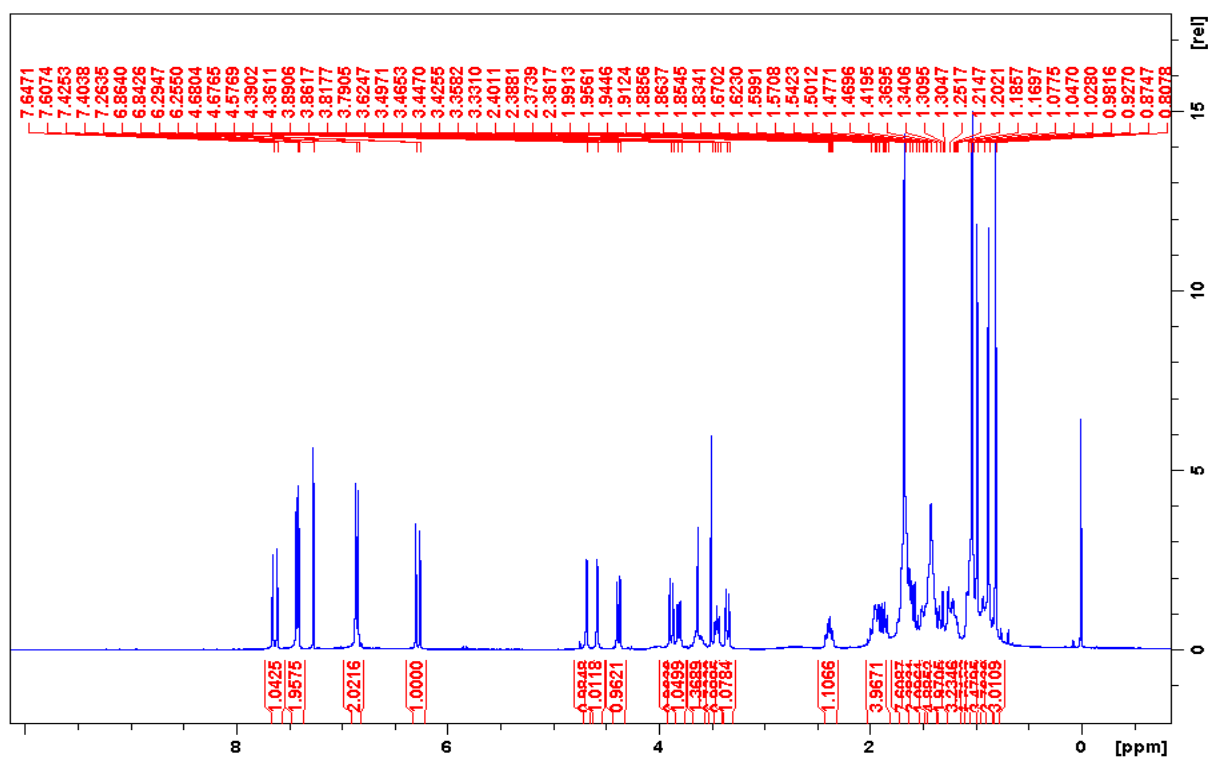

Figure S23.  $^{13}\text{C}$  DEPT 135 spectrum of compound **4** ( $\text{CDCl}_3$ , 100 MHz).

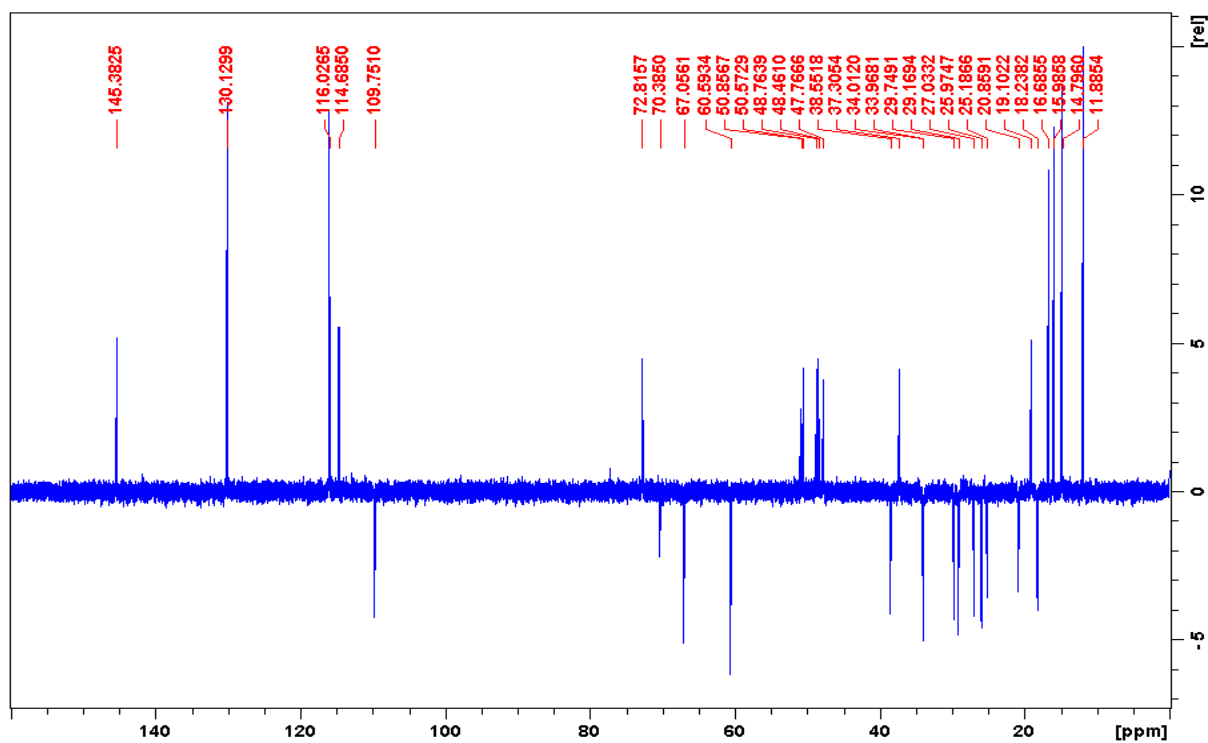

Figure S24.  $^{13}\text{C}$  NMR spectrum of compound **4** ( $\text{CDCl}_3$ , 100 MHz).

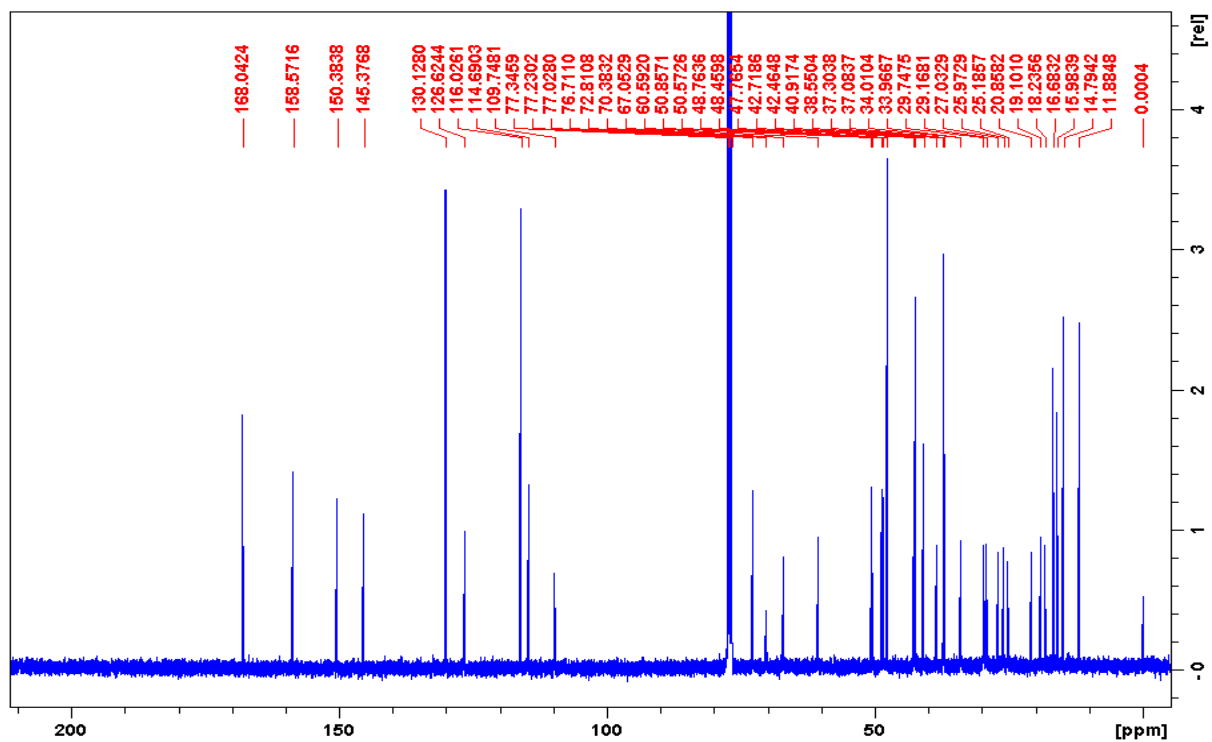

Figure S25. HSQC spectrum of compound **4** ( $\text{CDCl}_3$ , 400 MHz).

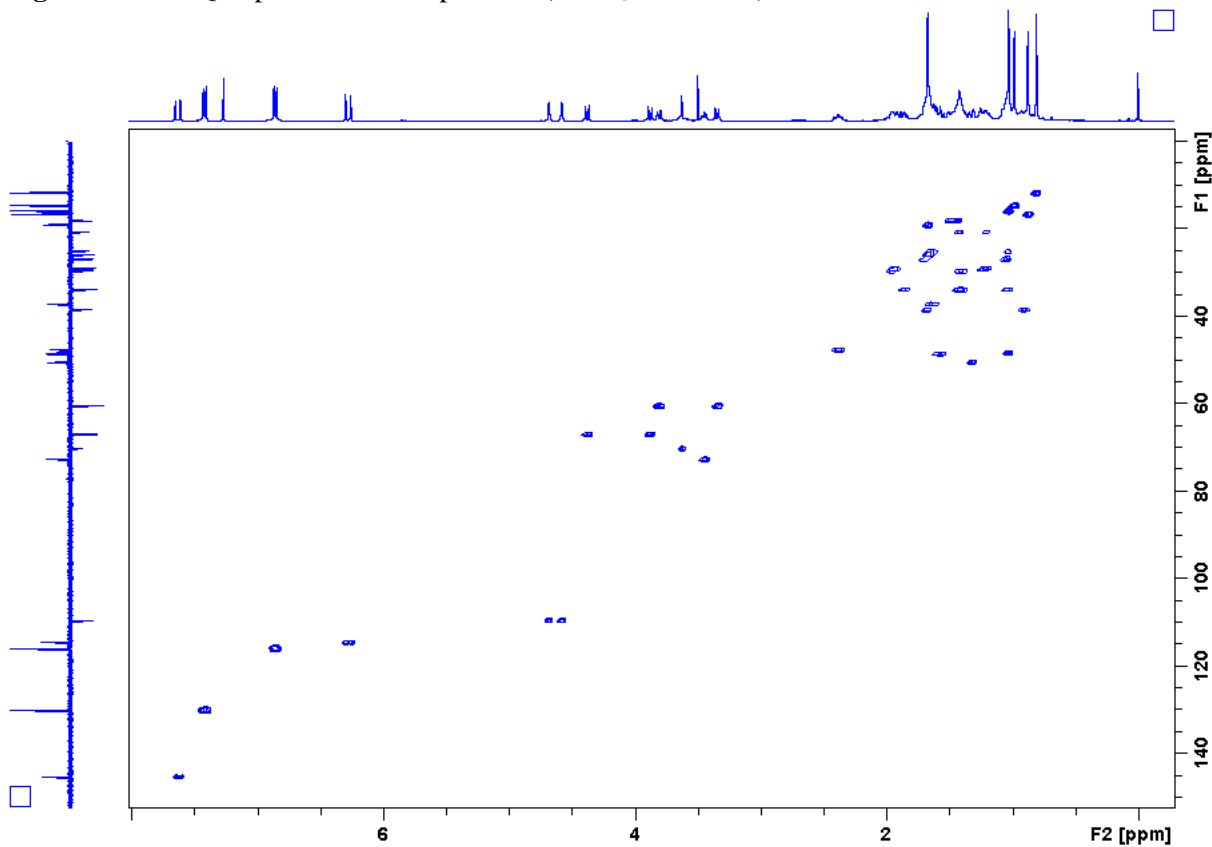



**Figure S26.** HMBC spectrum of compound **4** (CDCl<sub>3</sub>, 400 MHz).

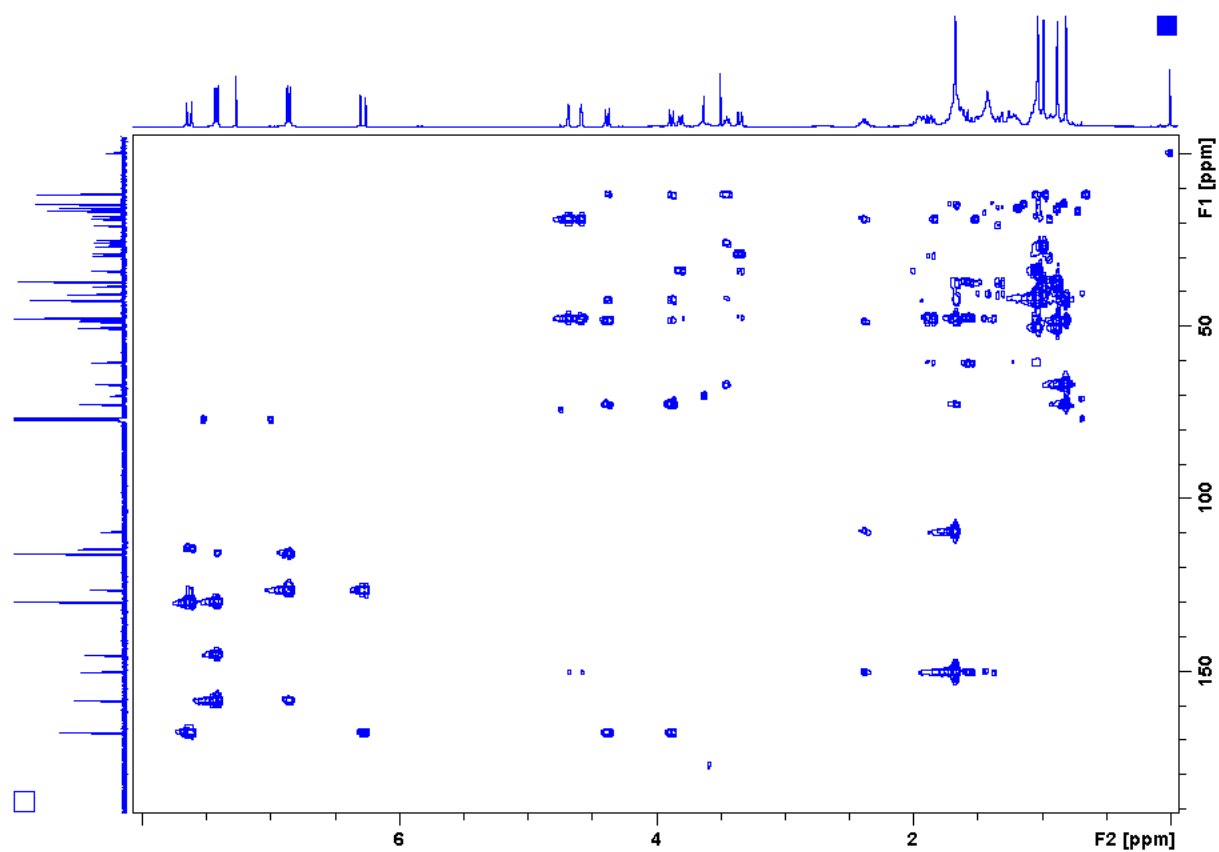

**Figure S27.** COSY spectrum of compound **4** (CDCl<sub>3</sub>, 400 MHz).

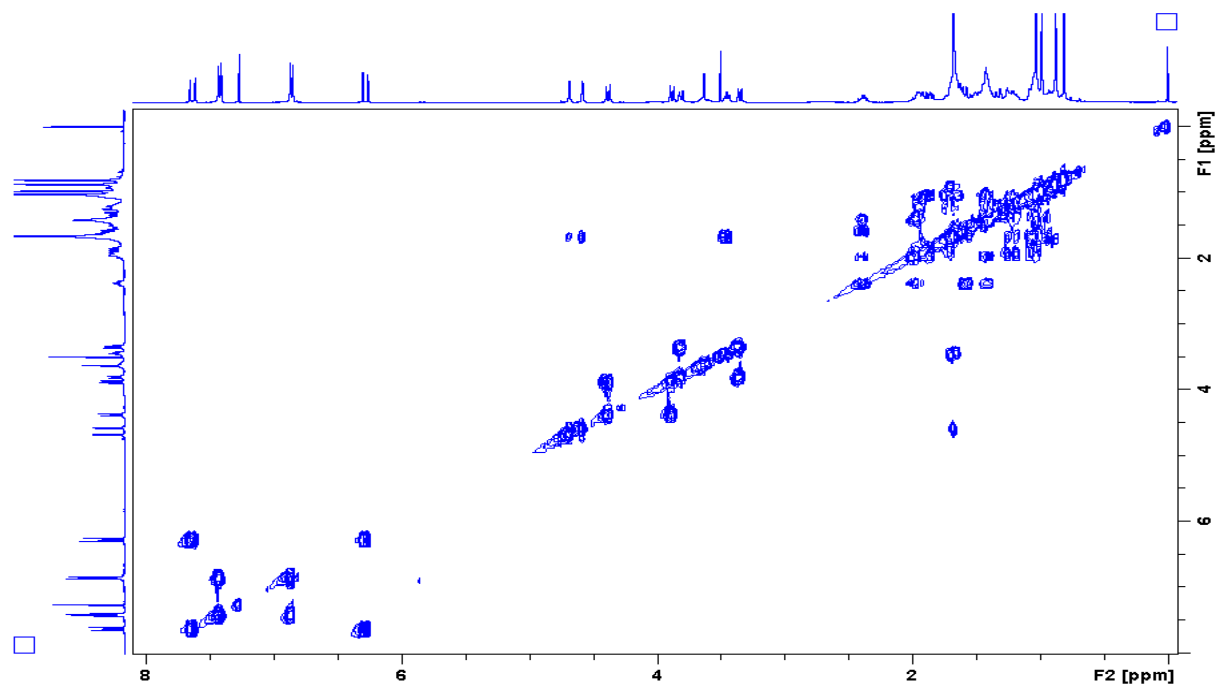

Figure S28. NOESY spectrum of compound **4** (CDCl<sub>3</sub>, 400 MHz).

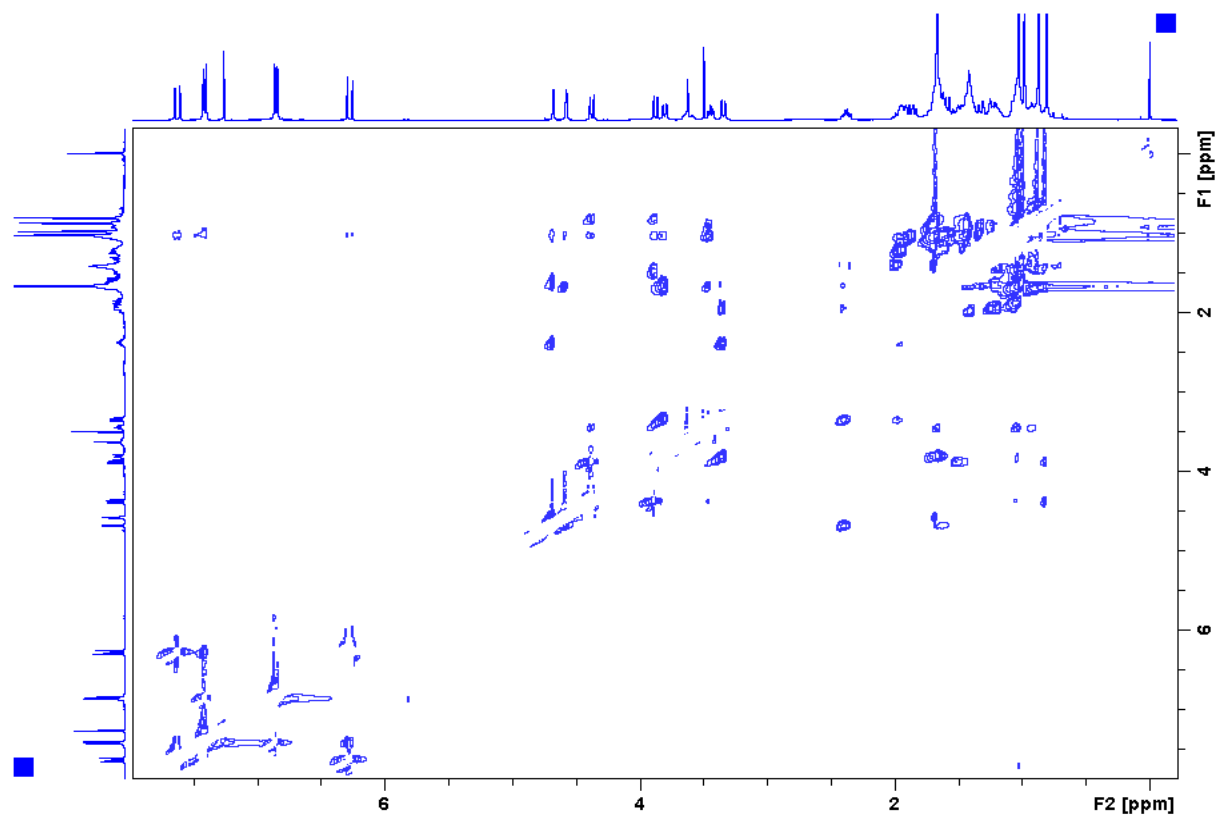

Figure S29. <sup>1</sup>H NMR spectra of compound **5** (CDCl<sub>3</sub>, 400 MHz).

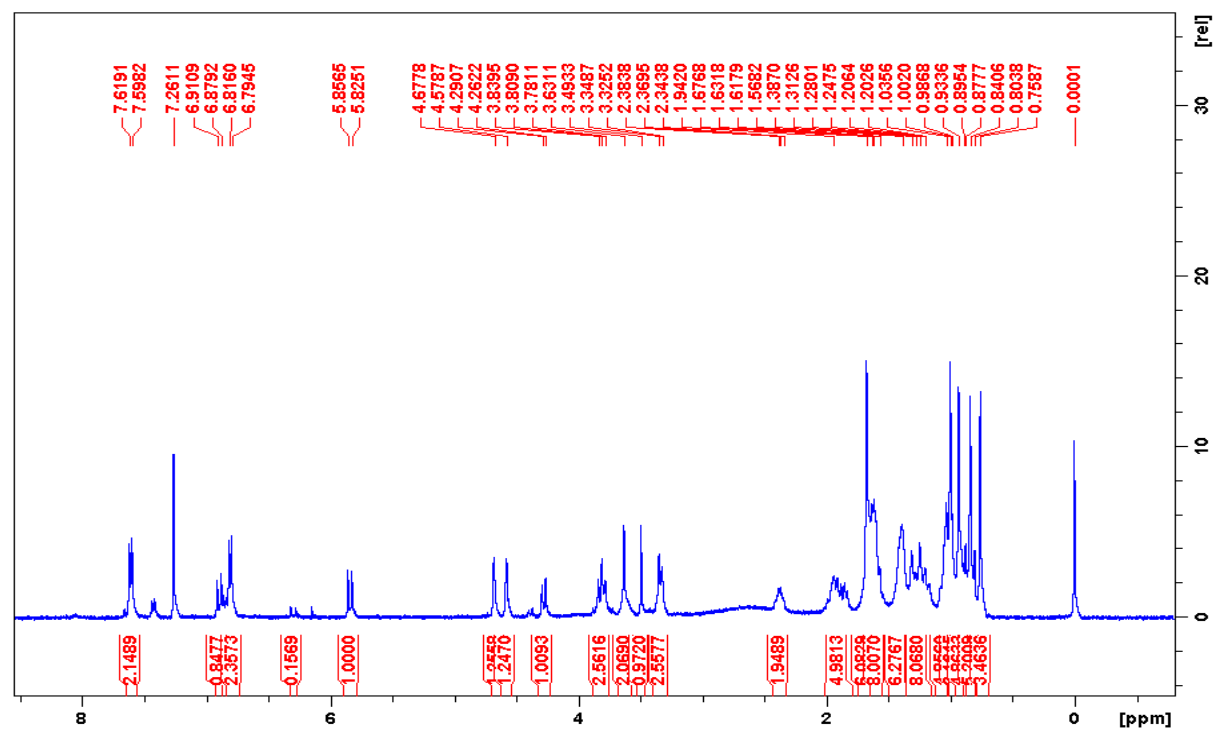

Figure S30.  $^{13}\text{C}$  DEPT 135 spectrum of compound **5** ( $\text{CDCl}_3$ , 100 MHz).

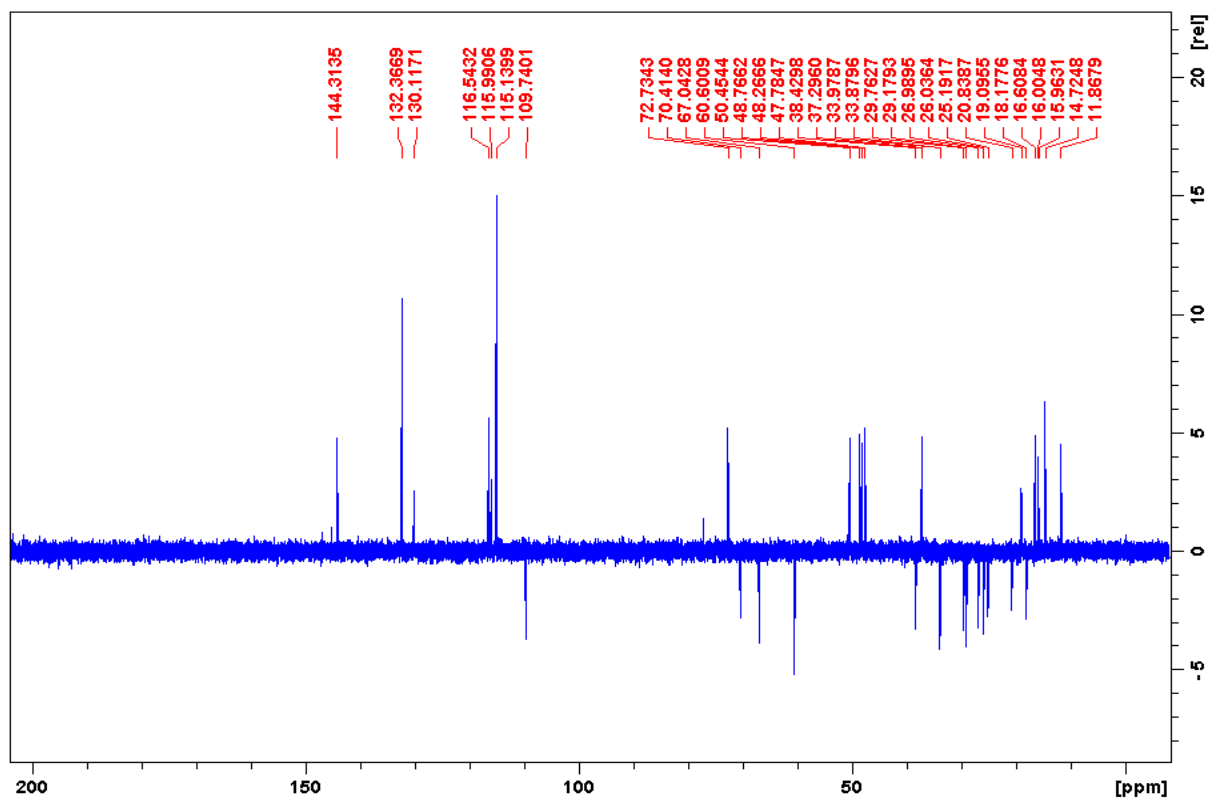

Figure S31.  $^{13}\text{C}$  NMR spectrum of compound **5** ( $\text{CDCl}_3$ , 100 MHz).

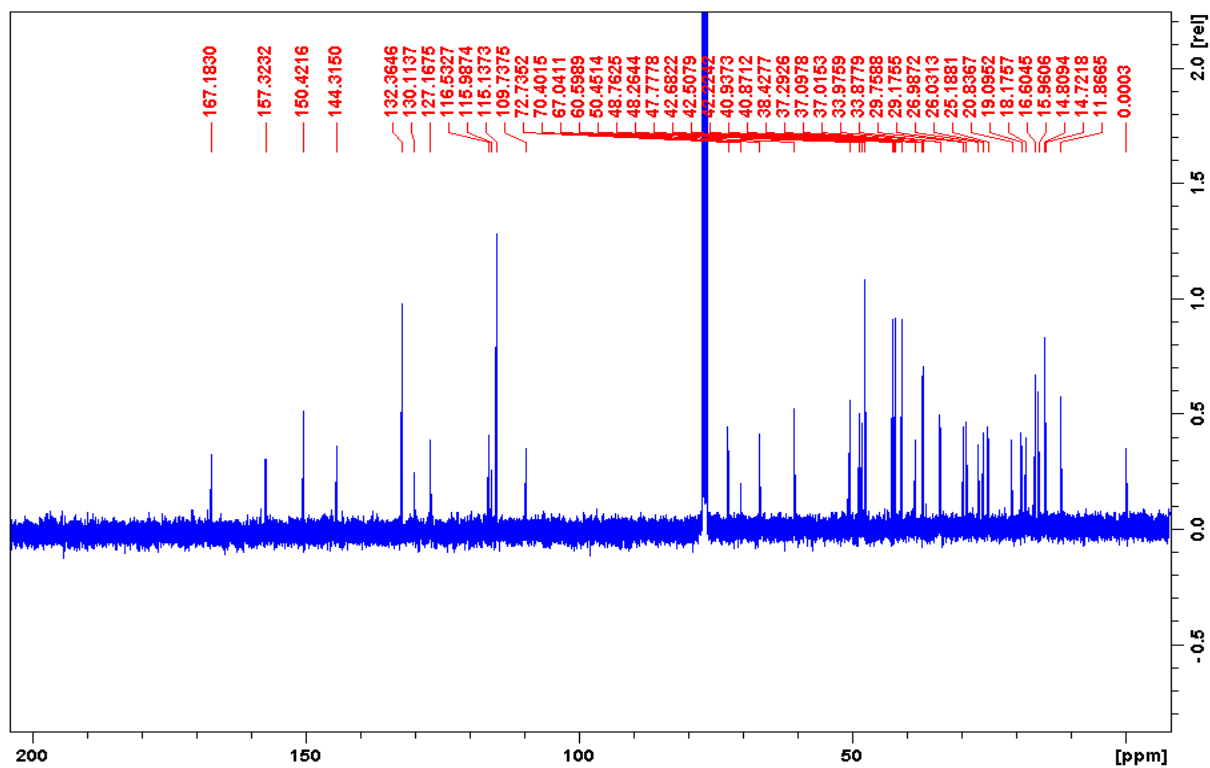

Figure S32. HSQC spectrum of compound **5** (CDCl<sub>3</sub>, 400 MHz).

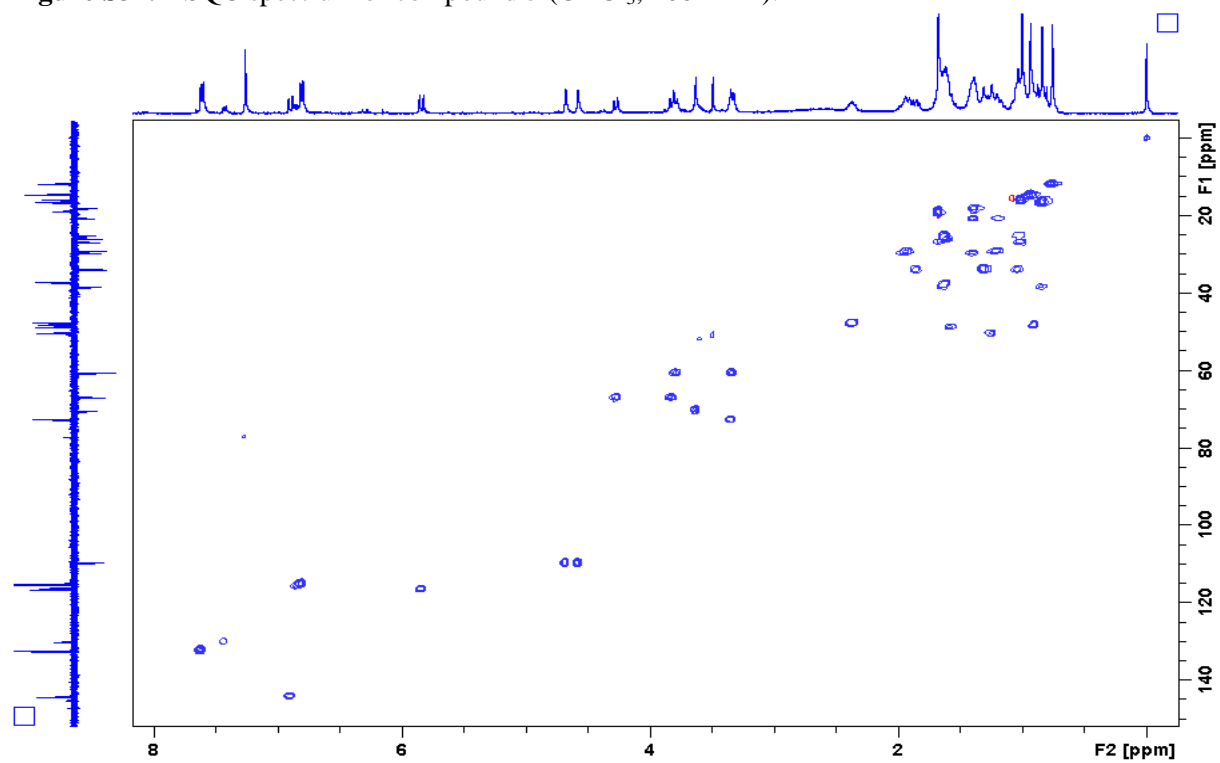

Figure S33. HMBC spectrum of compound **5** (CDCl<sub>3</sub>, 400 MHz).

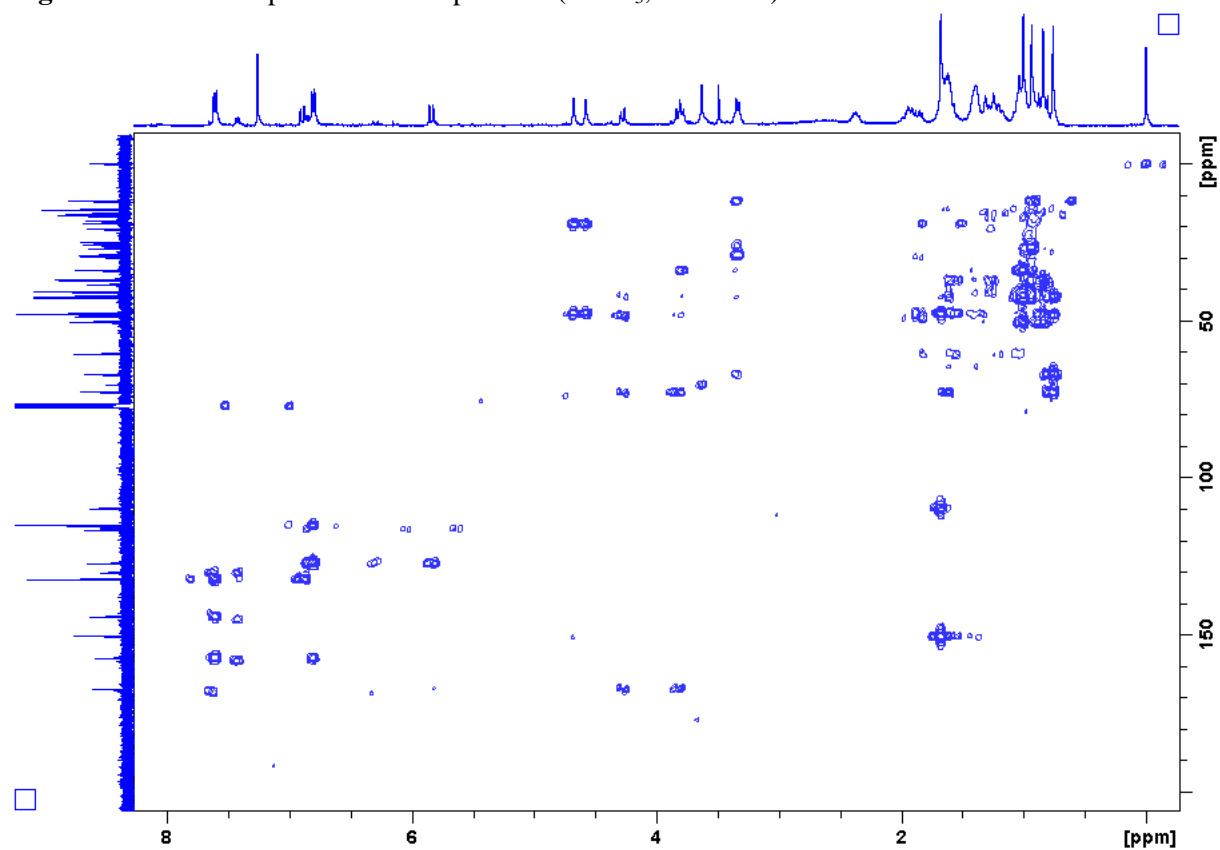

**Figure S34.** COSY spectrum of compound **5** (CDCl<sub>3</sub>, 400 MHz).

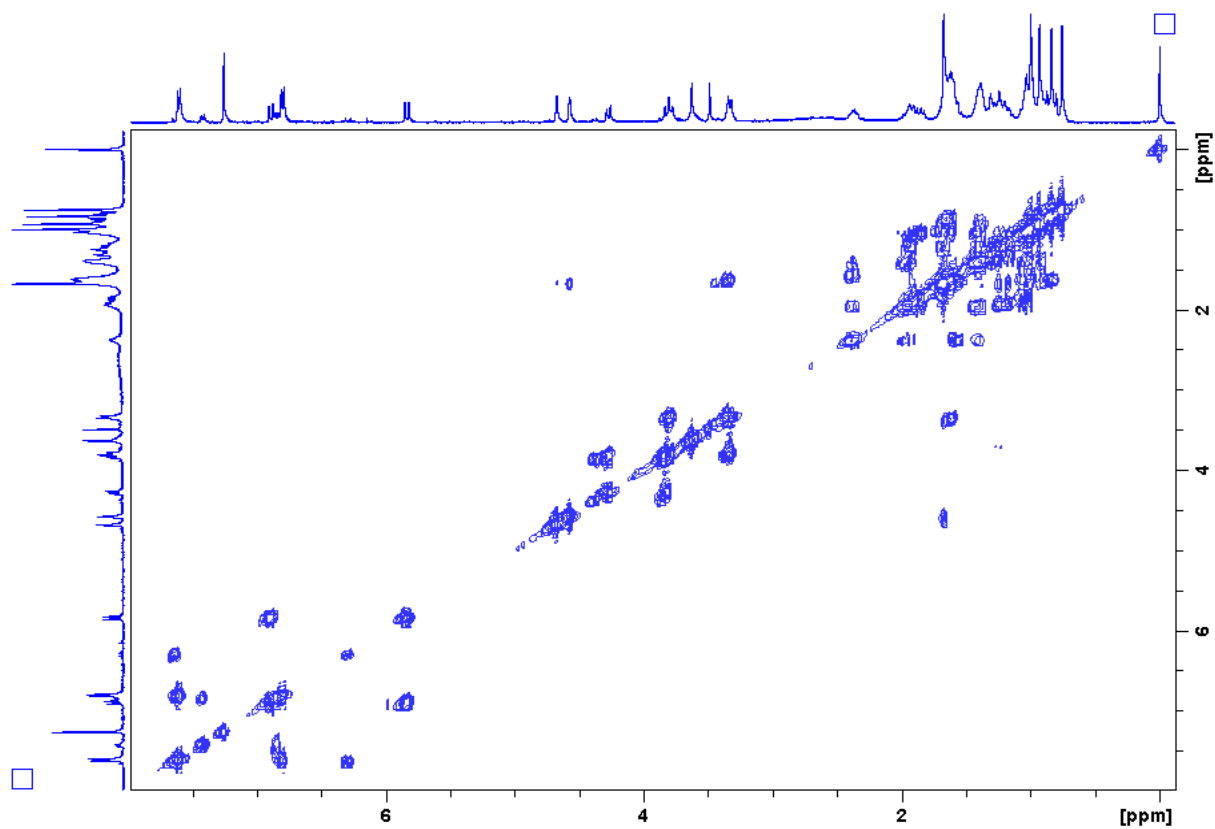

**Figure S35.** NOESY spectrum of compound **5** (CDCl<sub>3</sub>, 400 MHz).

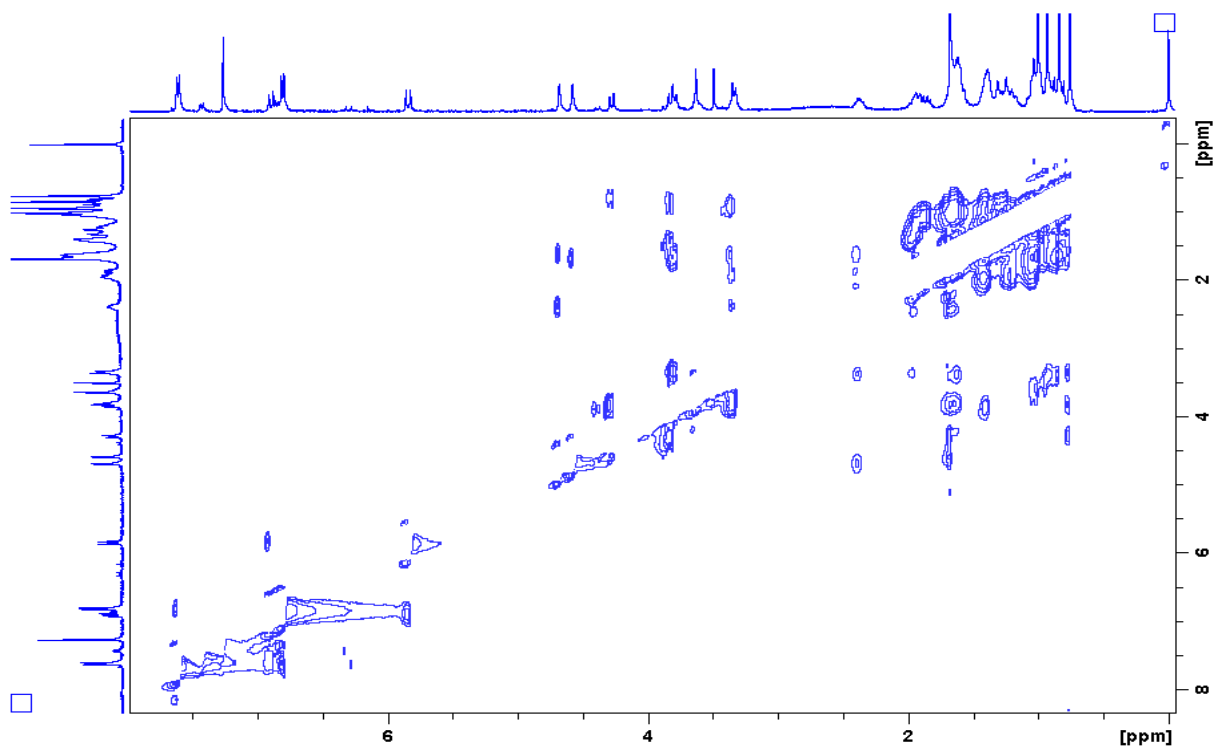

Figure S36. <sup>1</sup>H NMR spectra of 3,28-*O*-diacetylbetulin (CDCl<sub>3</sub>, 400 MHz).

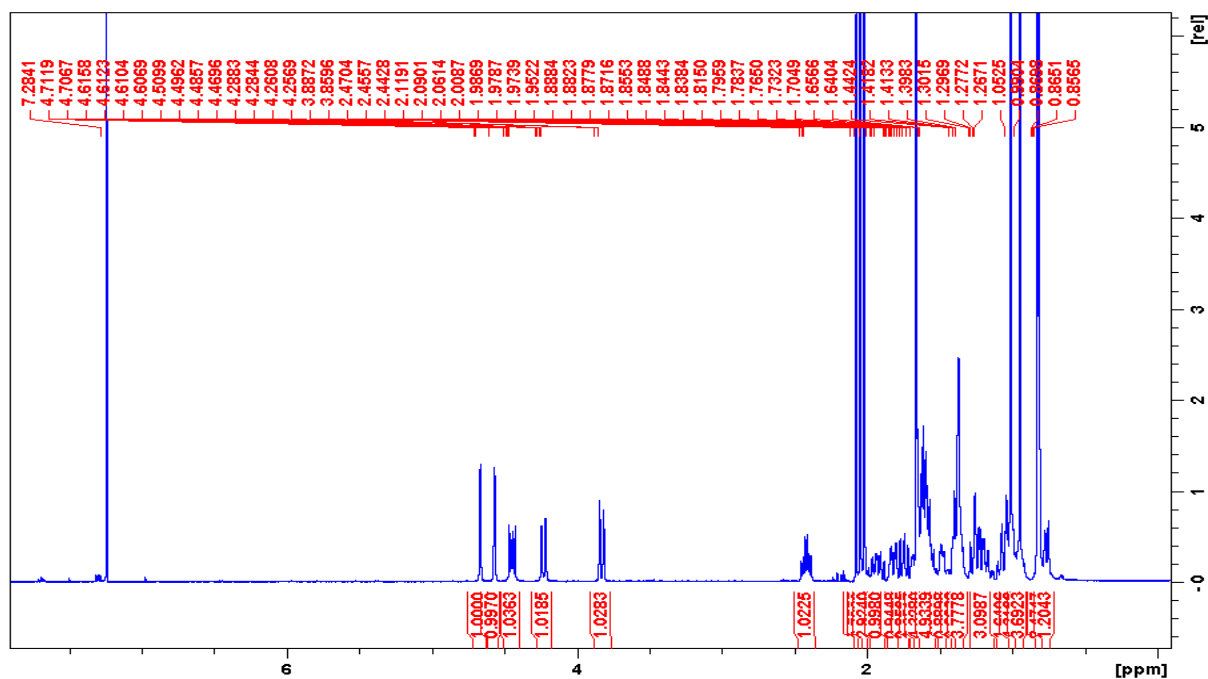

Figure S37. <sup>1</sup>H NMR spectra of 23-hydroxybetulin (CDCl<sub>3</sub>, 400 MHz).

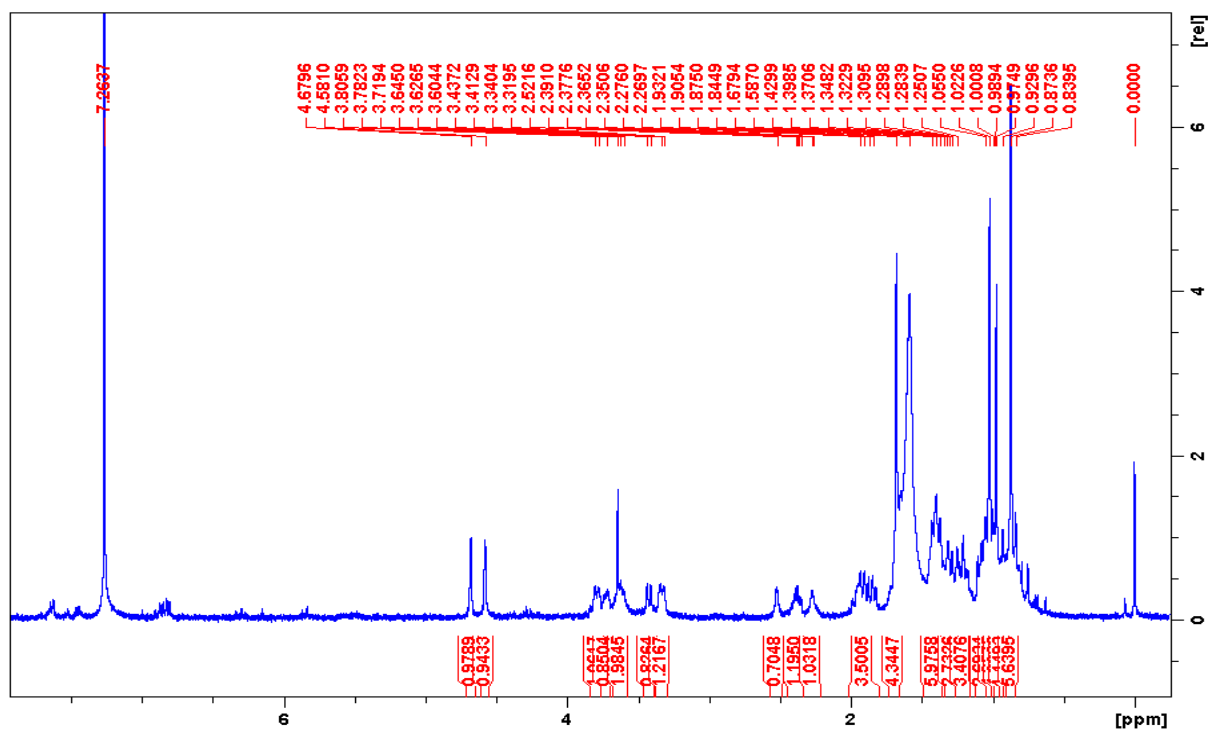

Supplement: NIHMS706646-supplement-Supporting_Information.pdf [file NIHMS706646-supplement-Supporting_Information.pdf]
